# Supplementary material for: Preparation, structure and properties of Na2Mn3(SO4)4: a new potential candidate with high voltage for Na-ion batteries
Source: Royal Society of Chemistry journal article supplement (doi:10.1039/c6ta02629j), 2016-01-01

## Preparation, structure and properties of $\text{Na}_2\text{Mn}_3(\text{SO}_4)_4$ : a new member with high-voltage for Na-ion batteries

Jianhua Gao <sup>\*a</sup>, Xunshan Sha <sup>a</sup>, Xi Liu <sup>a</sup>, Limei Song <sup>b</sup> and Pan Zhao <sup>a</sup>

<sup>a</sup> Department of Materials Physics, School of Physics, Northwest University, Xi'an, 710069, China.

<sup>b</sup> School of Chemical Engineering, Xi'an University, Xi'an 710065, China.

\* Email address: gaojh@nwu.edu.cn

**Table S1 Selected bond lengths (Å) and bond angles (°) for Na<sub>2</sub>Mn<sub>3</sub>(SO<sub>4</sub>)<sub>4</sub>**

|                                             |            |                                |            |                                             |            |
|---------------------------------------------|------------|--------------------------------|------------|---------------------------------------------|------------|
| Mn(1)-O(4)                                  | 2.095(3)   | S(1)-O(1) <sup>#3</sup>        | 1.463(3)   | Na-O(10) <sup>#2</sup>                      | 2.283(4)   |
| Mn(1)-O(9) <sup>#1</sup>                    | 2.096(3)   | S(1)-O(1)                      | 1.463(3)   | Na-O(7) <sup>#8</sup>                       | 2.330(3)   |
| Mn(1)-O(5)                                  | 2.161(3)   | S(1)-O(2)                      | 1.482(4)   | Na-O(9) <sup>#9</sup>                       | 2.415(4)   |
| Mn(1)-O(1)                                  | 2.172(3)   | S(1)-O(6) <sup>#5</sup>        | 1.490(5)   | Na-O(1) <sup>#10</sup>                      | 2.620(4)   |
| Mn(1)-O(10) <sup>#2</sup>                   | 2.216(3)   | S(2)-O(5) <sup>#5</sup>        | 1.468(3)   | Na-O(5)                                     | 2.637(4)   |
| Mn(1)-O(6)                                  | 2.408(2)   | S(2)-O(9)                      | 1.470(3)   | Na-O(3) <sup>#1</sup>                       | 2.650(4)   |
| Mn(2)-O(2)                                  | 2.082(4)   | S(2)-O(3)                      | 1.475(3)   | Na-O(2) <sup>#2</sup>                       | 2.750(4)   |
| Mn(2)-O(3)                                  | 2.123(3)   | S(2)-O(10)                     | 1.475(3)   | Na-O(4) <sup>#11</sup>                      | 2.917(4)   |
| Mn(2)-O(3) <sup>#3</sup>                    | 2.123(3)   | S(3)-O(4) <sup>#6</sup>        | 1.453(3)   |                                             |            |
| Mn(2)-O(8) <sup>#4</sup>                    | 2.161(5)   | S(3)-O(4) <sup>#7</sup>        | 1.453(3)   |                                             |            |
| Mn(2)-O(7)                                  | 2.174(4)   | S(3)-O(8)                      | 1.474(5)   |                                             |            |
| Mn(2)-O(8)                                  | 2.557(4)   | S(3)-O(7)                      | 1.494(5)   |                                             |            |
| O(1) <sup>#3</sup> -S(1)-O(1)               | 112.0(3)   | O(5) <sup>#5</sup> -S(2)-O(9)  | 107.9(2)   | O(4) <sup>#6</sup> -S(3)-O(4) <sup>#7</sup> | 113.1(3)   |
| O(1) <sup>#3</sup> -S(1)-O(2)               | 107.78(16) | O(5) <sup>#5</sup> -S(2)-O(3)  | 111.0(2)   | O(4) <sup>#6</sup> -S(3)-O(8)               | 110.53(18) |
| O(1)-S(1)-O(2)                              | 107.78(16) | O(9)-S(2)-O(3)                 | 109.48(19) | O(4) <sup>#7</sup> -S(3)-O(8)               | 110.53(18) |
| O(1) <sup>#3</sup> -S(1)-O(6) <sup>#5</sup> | 110.34(17) | O(5) <sup>#5</sup> -S(2)-O(10) | 109.2(2)   | O(4) <sup>#6</sup> -S(3)-O(7)               | 108.07(18) |
| O(1)-S(1)-O(6) <sup>#5</sup>                | 110.34(17) | O(9)-S(2)-O(10)                | 109.3(2)   | O(4) <sup>#7</sup> -S(3)-O(7)               | 108.07(18) |
| O(2)-S(1)-O(6) <sup>#5</sup>                | 108.5(3)   | O(3)-S(2)-O(10)                | 109.9(2)   | O(8)-S(3)-O(7)                              | 106.2(3)   |

Symmetry transformations used to generate equivalent atoms:

#1  $x+1/2, -y+3/2, z-1/2$ ; #2  $x+1/2, y+1/2, z$ ; #3  $-x+2, y, z$ ; #4  $-x+2, -y+1, z+1/2$ ; #5  $-x+2, -y+2, z+1/2$ ; #6  $-x+2, y-1, z$ ;  
#7  $x, y-1, z$ ; #8  $-x+5/2, -y+3/2, z-1/2$ ; #9  $-x+2, -y+2, z-1/2$ ; #10  $-x+5/2, y+1/2, z$ ; #11  $-x+5/2, -y+5/2, z-1/2$ .

Table S2. Anisotropic displacement parameters ( $\text{\AA}^2 \times 10^3$ ) for  $\text{Na}_2\text{Mn}_3(\text{SO}_4)_4$ . The anisotropic displacement factor exponent takes the form:  $-2 \pi^2 [h^2 a^{*2} U_{11} + \dots + 2 h k a^* b^* U_{12}]$ .

| Atom  | $U_{11}$ | $U_{22}$ | $U_{33}$ | $U_{23}$ | $U_{13}$ | $U_{12}$ |
|-------|----------|----------|----------|----------|----------|----------|
| Mn(1) | 16(1)    | 12(1)    | 16(1)    | 0(1)     | 3(1)     | 0(1)     |
| Mn(2) | 16(1)    | 15(1)    | 19(1)    | 1(1)     | 0        | 0        |
| S(1)  | 13(1)    | 11(1)    | 9(1)     | 1(1)     | 0        | 0        |
| S(2)  | 11(1)    | 13(1)    | 11(1)    | 0(1)     | 0(1)     | -1(1)    |
| S(3)  | 14(1)    | 12(1)    | 13(1)    | -3(1)    | 0        | 0        |
| Na    | 24(1)    | 33(1)    | 36(1)    | 5(1)     | 5(1)     | 1(1)     |
| O(1)  | 15(2)    | 24(2)    | 20(2)    | 7(1)     | 5(1)     | -3(1)    |
| O(2)  | 28(3)    | 10(2)    | 19(3)    | 2(2)     | 0        | 0        |
| O(3)  | 13(1)    | 24(2)    | 28(2)    | 5(1)     | -1(2)    | 2(1)     |
| O(4)  | 24(2)    | 30(2)    | 26(2)    | -11(2)   | 0(2)     | 13(1)    |
| O(5)  | 27(2)    | 18(1)    | 24(2)    | 5(1)     | 1(2)     | -5(1)    |
| O(6)  | 21(2)    | 26(2)    | 10(2)    | 4(2)     | 0        | 0        |
| O(7)  | 19(2)    | 18(2)    | 11(2)    | -4(2)    | 0        | 0        |
| O(8)  | 24(3)    | 23(2)    | 19(3)    | 6(2)     | 0        | 0        |
| O(9)  | 16(2)    | 21(2)    | 23(2)    | 7(1)     | 3(1)     | -1(1)    |
| O(10) | 21(2)    | 31(2)    | 9(2)     | -4(1)    | -1(1)    | 2(1)     |

Table S3 some parameters at different temperature.

| T(°C) | T(K) | $R_b$ ( $\Omega$ )  | $\sigma$ ( $\text{Scm}^{-1}$ ) |
|-------|------|---------------------|--------------------------------|
| 150   | 423  | $4.247 \times 10^8$ | $3.93219 \times 10^{-10}$      |
| 200   | 473  | $3.946 \times 10^7$ | $4.23213 \times 10^{-9}$       |
| 250   | 523  | $9.259 \times 10^6$ | $1.80365 \times 10^{-8}$       |
| 300   | 573  | $3.735 \times 10^6$ | $4.47122 \times 10^{-8}$       |
| 350   | 623  | $8.02 \times 10^5$  | $2.08229 \times 10^{-7}$       |
| 400   | 673  | $1.301 \times 10^5$ | $1.28363 \times 10^{-6}$       |
| 450   | 723  | $2.227 \times 10^4$ | $7.49888 \times 10^{-6}$       |
| 500   | 773  | $2.606 \times 10^3$ | $6.40829 \times 10^{-5}$       |

Fig. S1 Local surrounding of Na atom.

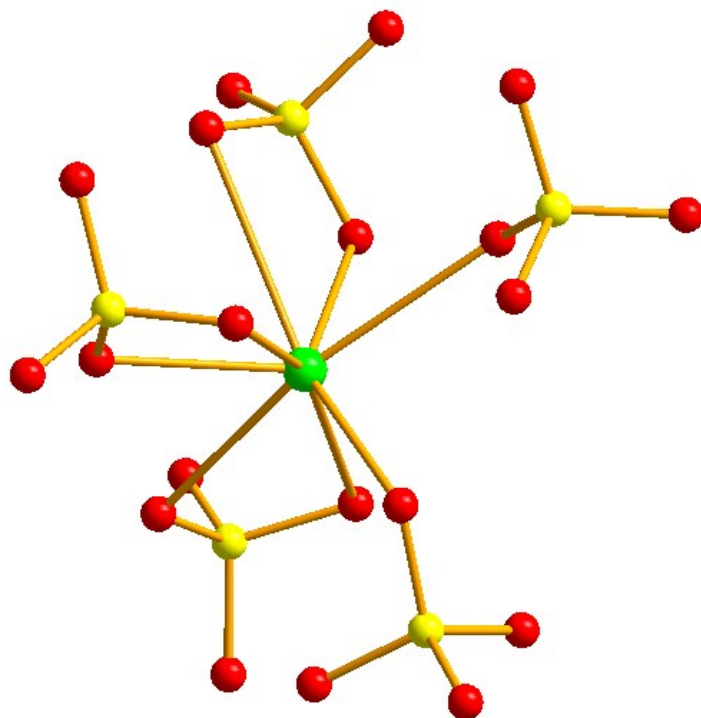

Fig. S2 IR Spectra of  $\text{Na}_2\text{Mn}_3(\text{SO}_4)_4$ .

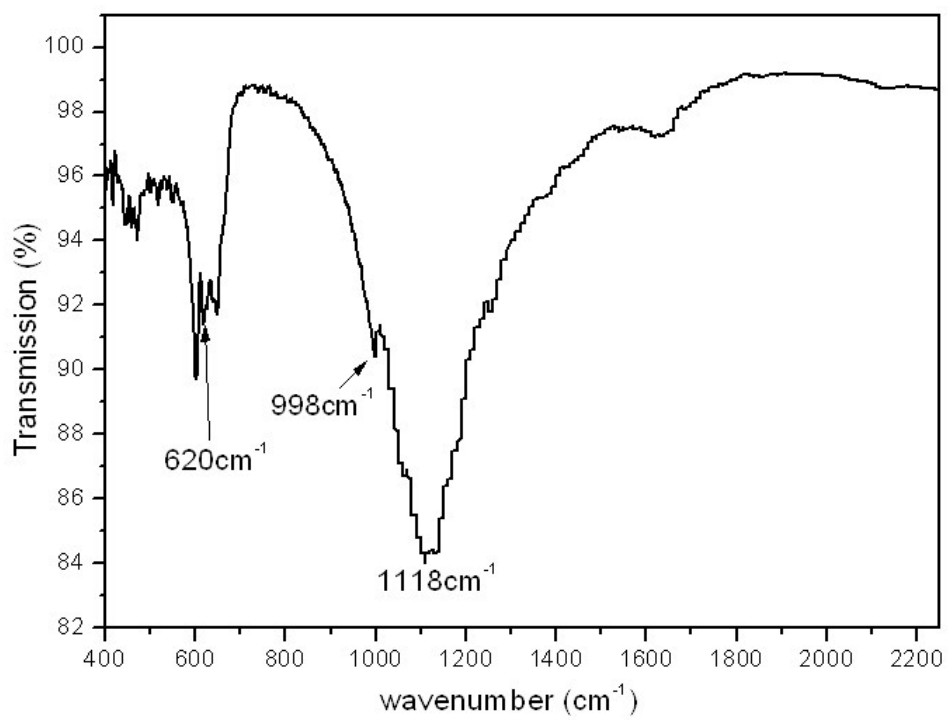

Fig. S3 Electronic band structure of  $\text{Na}_2\text{Mn}_3(\text{SO}_4)_4$ .

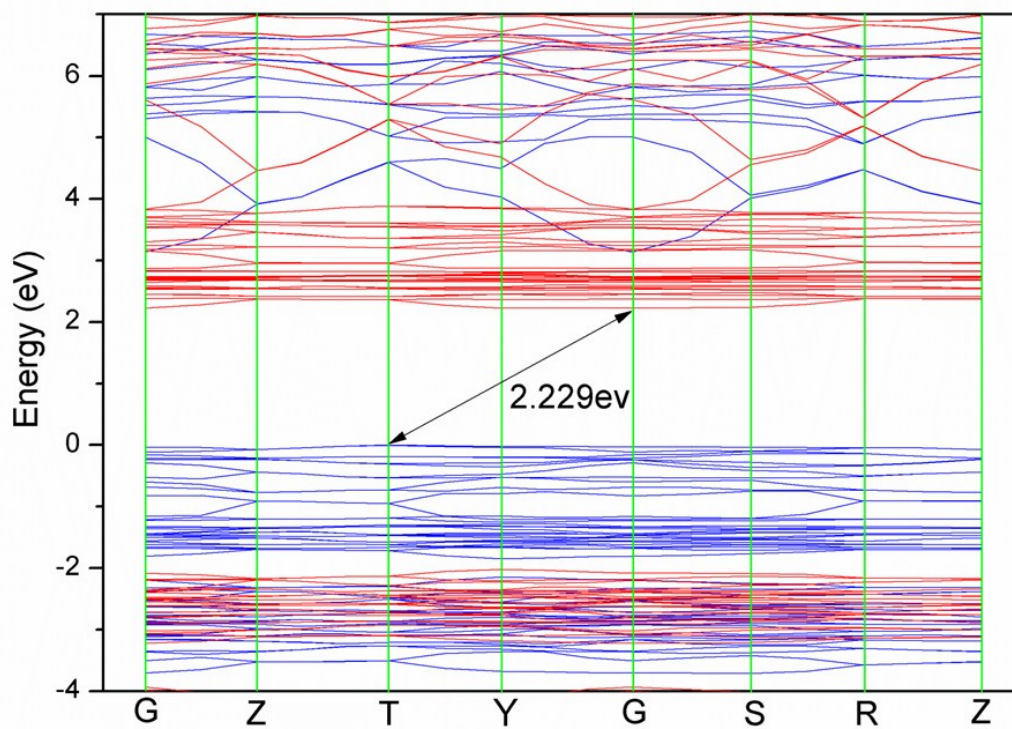

Supplement: c6ta02629j1.pdf [file c6ta02629j1.pdf]
